# Supplementary material for: Casein-fed mice showed faster recovery from DSS-induced colitis than chicken-protein-fed mice
Source: Royal Society of Chemistry journal article supplement (doi:10.1039/d1fo00659b), 2021-01-01

Casein-fed mice showed faster recovery from DSS-induced colitis than  
chicken-protein-fed mice

Lili Yu<sup>1</sup>, Di Zhao<sup>1</sup>, Yingqun Nian<sup>1</sup>, Chunbao Li<sup>1\*</sup>

<sup>1</sup>Key Laboratory of Meat Processing and Quality Control, MOE; Key Laboratory of Meat Processing, MARA, Jiangsu Collaborative Innovation Center of Meat Production and Processing, Quality and Safety Control; Nanjing Agricultural University, Nanjing 210095, P.R. China

Corresponding author:

Dr. Chunbao Li

E-mail: [chunbao.li@njau.edu.cn](mailto:chunbao.li@njau.edu.cn)

Address: College of Food Science and Technology, Nanjing Agricultural University,  
Weigang 1#, 210095, Nanjing, P.R. China

Table S1 Crude composition of protein powders (%)

|         | Casein | Chicken |
|---------|--------|---------|
| protein | 88.65  | 86.88   |
| water   | 9.90   | 10.34   |
| ash     | 1.09   | 1.80    |
| fat     | 0.36   | 0.98    |

Table S2 Mineral composition of protein powders (mg/Kg)

|    | Casein | Chicken |
|----|--------|---------|
| Ca | 305.9  | 240.0   |
| Cu | 4.0    | 3.0     |
| Fe | 41.9   | 12.1    |
| K  | 69.7   | 3171.5  |
| Mg | 178.4  | 493.3   |
| P  | 5291.0 | 2982.1  |
| Zn | 55.2   | 13.9    |
| Na | 64.2   | 367.2   |

Table S3 Ingredient composition of mineral mixes of the two diets (g/Kg diet)

|                                                   | Casein   | Chicken  |
|---------------------------------------------------|----------|----------|
| calcium carbonate, anhydrous, Ca 40.04%           | 12.33500 | 12.36500 |
| potassium dihydrogen phosphate, P 22.76% K 28.73% | 7.86200  | 10.02200 |
| sodium dihydrogen phosphate, P 22.76% Na 28.73%   | 0.69800  | 0.50700  |
| potassium Citrate, K 36.16%                       | 3.46700  | 0.00000  |
| sodium chloride, Na 39.34%                        | 2.03400  | 2.03400  |
| potassium sulphate, S 18.39% K 44.87%             | 1.63100  | 1.63100  |
| magnesium oxide, Mg 60.32%                        | 0.79100  | 0.68400  |
| iron citrate, Fe 16.5%                            | 0.22200  | 0.25800  |
| zinc carbonate, Zn 52.14%                         | 0.05200  | 0.06700  |
| cupric carbonate, Cu 57.47%                       | 0.01050  | 0.01050  |
| manganous carbonate, Mn 47.79%                    | 0.02205  | 0.02205  |
| potassium iodate, I 59.3%                         | 0.00035  | 0.00035  |

|                                                   |         |         |
|---------------------------------------------------|---------|---------|
| sodium selenate, Se 41.79%                        | 0.00036 | 0.00036 |
| ammonium paramolybdate, 4 hydrate, Mo 54.34%      | 0.00028 | 0.00028 |
| sodium meta-silicate, 9 hydrate, Si 9.88%         | 0.05080 | 0.05080 |
| chromium potassium sulfate, 12 hydrate, Cr 10.42% | 0.00960 | 0.00960 |
| boric acid, B 17.5%                               | 0.00290 | 0.00290 |
| sodium fluoride, F 45.24%                         | 0.00220 | 0.00220 |
| nickel carbonate, Ni 45%                          | 0.00111 | 0.00111 |
| lithium chloride, Li 16.38%                       | 0.00061 | 0.00061 |
| ammonium vanadate, V 43.55%                       | 0.00023 | 0.00023 |
| Total                                             | 29.1927 | 27.6688 |

Table S4 Ingredient composition and nutritional content of diets (g/Kg diet)

|                          | Casein  | Chicken |
|--------------------------|---------|---------|
| Protein powder           | 200.00  | 204.00  |
| Cornstarch               | 400.83  | 400.83  |
| Dextrinised cornstarch   | 132.00  | 132.00  |
| Sucrose                  | 100.00  | 100.00  |
| Soybean oil              | 70.00   | 70.00   |
| Fiber                    | 50.00   | 50.00   |
| Mineral mix <sup>2</sup> | 29.19   | 27.67   |
| Vitamin mix <sup>3</sup> | 10.00   | 10.00   |
| L-cystine                | 3.00    | 3.00    |
| Choline chloride         | 2.50    | 2.50    |
| Water                    | 2.48    | 0.00    |
| Total                    | 1000.00 | 1000.00 |

Protein<sup>1</sup>, the amount of protein powder was adjusted and balanced according to the protein content in casein and chicken protein powder. Mineral mix<sup>2</sup>, the formulation of mineral mixes for the two diets is listed in Table S3. Vitamin mix<sup>3</sup>: the formulation of vitamin mix as described <sup>[1]</sup>.

[1] P. G. Reeves, F. H. Nielsen, G. C. Fahey, AIN-93 purified diets for laboratory

rodents: final report of the American Institute of Nutrition Ad Hoc Writing Committee on the reformulation of the AIN-76A rodent diet, *J Nutr.*, 1993. **123**,1939-1951.

Table S5 Scoring of disease activity index (DAI).

| Score | Loss of weight | Visible fecal blood | Stool consistency    |
|-------|----------------|---------------------|----------------------|
| 0     | None           | None                | Normal               |
| 1     | 0%-5%          | Slightly bloody     | Slightly loose feces |
| 2     | 5%-10%         | Moderately bloody   | Loose feces          |
| 3     | 10%-20%        | Bloody              | Diarrhea             |
| 4     | >20%           | Severely blood      | Severe diarrhea      |

Table S6 Scoring of colonic histology.

| Score | Severity of inflammatory infiltration                                                 | Crypt injury                                           | Disappearance of goblet cells |
|-------|---------------------------------------------------------------------------------------|--------------------------------------------------------|-------------------------------|
| 0     | Normal                                                                                | None                                                   | None                          |
| 1     | Occasionally, cell limited to submucosa                                               | Some crypt damage                                      | Rarely disappeared            |
| 2     | Significant presence of inflammatory cells in submucosa                               | Large spaces between crypts, some shortening of crypts | Slightly disappeared          |
| 3     | Infiltrate present in both submucosa and lamina propria                               | Large areas without crypts                             | Moderately disappeared        |
| 4     | Large amount of infiltrate in submucosa, lamina propria and surrounding blood vessels | No crypts                                              | Depletion of goblet cells     |

Table S7 Primer sequences used in RT-qPCR assays in colonic tissue.

| Target genes  | Primer Sequence (5'-3')    | Annealing T (°C) |
|---------------|----------------------------|------------------|
| TNF- $\alpha$ | FW: CTCATGCACCACCATCAAGG   | 59               |
|               | RV: ACCTGACCACTCTCCCTTTG   |                  |
| ZO-1          | FW: TGTTTATGCGGACGGTGGCG   | 64               |
|               | RV: TCCATTGCTGTGCTCTTAGCGG |                  |
| MUC1          | FW: TGCCCTTCCAAGTGAGGAAA   | 59               |
|               | RV: CTGGAGTGGTAGTCGATGCT   |                  |
| COX-2         | FW: CCCATTAGCAGCCAGTTGTC   | 59               |
|               | RV: CAGGATGCAGTGCTGAGTTC   |                  |
| MUC2          | FW: TTTGGGTCCTGTGGGACTTT   | 59               |
|               | RV: ACTGGTCTTCTCCTCCTTGC   |                  |
| TLR-4         | FW: GCCACCAGTTACAGATCGTC   | 58               |
|               | RV: GAGGCATCATCCTGGCATT    |                  |
| IL-15         | FW: AGAGTTCTGGATGGATGGCA   | 58               |
|               | RV: TGCCCAGGTAAGAGCTTCAA   |                  |
| GAPDH         | FW: GGACTTACAGAGGTCCGCTT   | 59               |
|               | RV: CTATAGGGCCTGGGTCAGTG   |                  |

Table S8. The degree of hydrolysis (DH) of samples during gastrointestinal digestion.

|                 | DH (%)          |                  |                 |                  |
|-----------------|-----------------|------------------|-----------------|------------------|
|                 | G <sub>15</sub> | G <sub>120</sub> | I <sub>15</sub> | I <sub>120</sub> |
| Casein          | 3.86 ± 0.54     | 13.15 ± 0.25     | 47.20 ± 3.86**  | 60.71 ± 2.45**   |
| Chicken Protein | 3.67 ± 0.55     | 14.21 ± 1.97     | 29.22 ± 4.83    | 37.83 ± 8.13     |

G15 and G120 indicate digestibility after 15 or 120 min of gastric digestion; I15 and I120 indicate digestibility after 120 min of gastric digestion and 15 or 120 min of intestinal digestions.

## Degree of hydrolysis (DH)

### Method

Chicken protein and casein were digested by gastric and intestinal digestive enzymes using the INFOGEST method <sup>[1]</sup>. The protein digestibility was calculated by the change of primary amino group content before and after enzyme treatments, which was quantified by a fluorescamine method as described previously <sup>[2]</sup>. The degree of hydrolysis (DH) was determined as follows:

$$DH = \frac{[-NH_2(h)] - [-NH_2(0)]}{[-NH_2(\infty)] - [-NH_2(0)]}$$

$[-NH_2]$  indicates the concentration of primary amines in the hydrolyzed (h) or unhydrolyzed (0) samples and  $[-NH_2(\infty)]$  indicates the maximum primary amine concentration assuming total digestion to free amino acids (AAs). The  $[-NH_2(\infty)]$

value was determined the fluorescence of each sample (before digestion) that was totally hydrolyzed by 6 M hydrochloric acid at 100 °C for 48 h.

## References

- [1] A. Brodkorb, L. Egger, M. Alming, P. Alvito, R. Assunção, S. Ballance, T. Bohn, C. Bourlieu-Lacanal, R. Boutrou, F. Carrière, A. Clemente, M. Corredig, INFOGEST static in vitro simulation of gastrointestinal food digestion, *Nat Protocols.*, 2019, **14**, 991-1014.
- [2] D. Zhao, Y. Xu, T. Gu, H. Wang, Y. Yin, B. Sheng, Y. Li, Y. Nian, C. Wang, C. Li, X. Xu, G. Zhou, Peptidomic investigation of the interplay between enzymatic tenderization and the digestibility of beef semimembranosus proteins, *J Agr. Food Chem.*, 2020, **68**, 1136.

Figure S1. The mRNA levels of TNF- $\alpha$  (A), IL-15 (B), TLR-4 (C), ZO-1 (D) and COX-2 (E) in the colon, respectively.

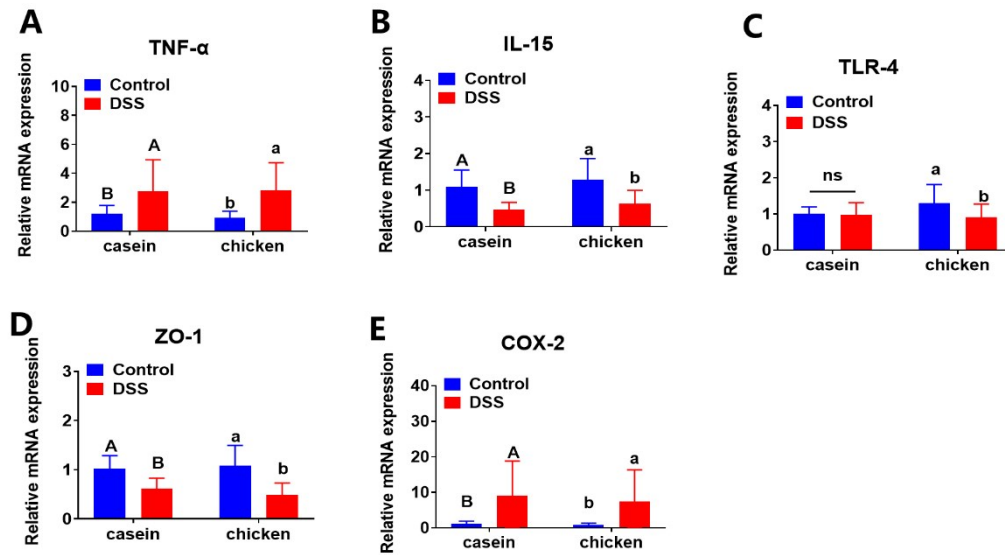

Figure S2. The gut microbiota composition at phylum level on day 21.

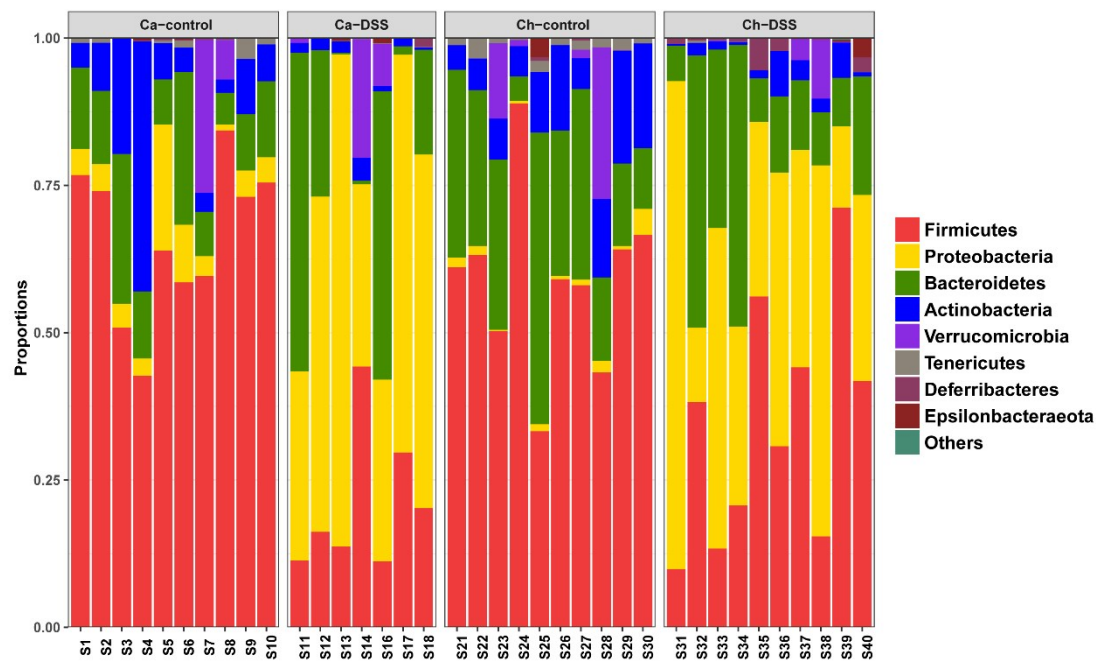

Figure S3. A Venn diagram showing the overlap of the OTUs identified in the gut microbiota among six groups on day 27.

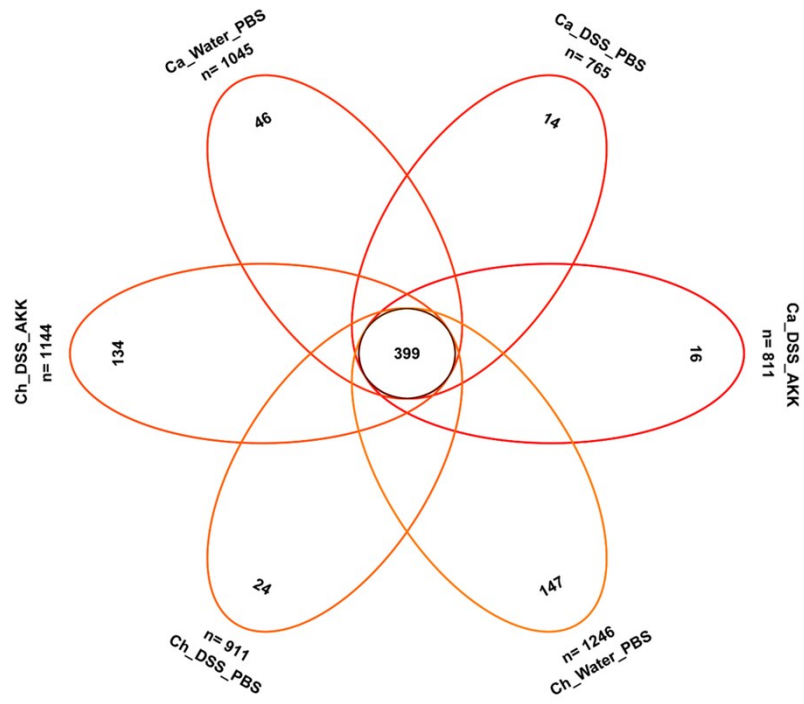

Supplement: d1fo00659b1.pdf [file d1fo00659b1.pdf]
